# Supplementary material
Source: publisher figshare collection journal article supplement (https://acs.figshare.com/ndownloader/files/4233103)
Supplement: Supplementary file 1 [file 4233103]

 
data_6 
  
_audit_creation_method            SHELXL-97 
_chemical_name_systematic 
; 
 ? 
; 
_chemical_name_common             ? 
_chemical_melting_point           ? 
_chemical_formula_moiety          ? 
_chemical_formula_sum 
 'C28 H41 Cl3 F24 Ir2 N4 O10 P4' 
_chemical_formula_weight          1664.28 
  
loop_ 
 _atom_type_symbol 
 _atom_type_description 
 _atom_type_scat_dispersion_real 
 _atom_type_scat_dispersion_imag 
 _atom_type_scat_source 
 'C'  'C'   0.0033   0.0016 
 'International Tables Vol C Tables 4.2.6.8 and 6.1.1.4' 
 'H'  'H'   0.0000   0.0000 
 'International Tables Vol C Tables 4.2.6.8 and 6.1.1.4' 
 'N'  'N'   0.0061   0.0033 
 'International Tables Vol C Tables 4.2.6.8 and 6.1.1.4' 
 'O'  'O'   0.0106   0.0060 
 'International Tables Vol C Tables 4.2.6.8 and 6.1.1.4' 
 'F'  'F'   0.0171   0.0103 
 'International Tables Vol C Tables 4.2.6.8 and 6.1.1.4' 
 'Cl'  'Cl'   0.1484   0.1585 
 'International Tables Vol C Tables 4.2.6.8 and 6.1.1.4' 
 'Ir'  'Ir'  -1.4442   7.9887 
 'International Tables Vol C Tables 4.2.6.8 and 6.1.1.4' 
 'P'  'P'   0.1023   0.0942 
 'International Tables Vol C Tables 4.2.6.8 and 6.1.1.4' 
  
_symmetry_cell_setting            Monoclinic 
_symmetry_space_group_name_H-M    P2(1)/n 
  
loop_ 
 _symmetry_equiv_pos_as_xyz 
 'x, y, z' 
 '-x+1/2, y+1/2, -z+1/2' 
 '-x, -y, -z' 
 'x-1/2, -y-1/2, z-1/2' 
  
_cell_length_a                    13.003(2) 
_cell_length_b                    10.798(2) 
_cell_length_c                    18.699(4) 
_cell_angle_alpha                 90.00 
_cell_angle_beta                  91.086(3) 
_cell_angle_gamma                 90.00 
_cell_volume                      2625.0(8) 
_cell_formula_units_Z             2 
_cell_measurement_temperature     100(2) 
_cell_measurement_reflns_used     4919 
_cell_measurement_theta_min       2.45 
_cell_measurement_theta_max       28.93 
  
_exptl_crystal_description        plate 
_exptl_crystal_colour             yellow 
_exptl_crystal_size_max           0.30 
_exptl_crystal_size_mid           0.15 
_exptl_crystal_size_min           0.05 
_exptl_crystal_density_meas       ? 
_exptl_crystal_density_diffrn     2.106 
_exptl_crystal_density_method     'not measured' 
_exptl_crystal_F_000              1596 
_exptl_absorpt_coefficient_mu     5.475 
_exptl_absorpt_correction_type    multi-scan 
_exptl_absorpt_correction_T_min   0.2904 
_exptl_absorpt_correction_T_max   0.7714 
_exptl_absorpt_process_details    sadabs 
  
_exptl_special_details 
; 
 ? 
; 
  
_diffrn_ambient_temperature       100(2) 
_diffrn_radiation_wavelength      0.71073 
_diffrn_radiation_type            MoK\a 
_diffrn_radiation_source          'fine-focus sealed tube' 
_diffrn_radiation_monochromator   graphite 
_diffrn_measurement_device_type   'Bruker APEX-II CCD' 
_diffrn_measurement_method        '\f and \w scans' 
_diffrn_detector_area_resol_mean  ? 
_diffrn_reflns_number             4479 
_diffrn_reflns_av_R_equivalents   0.0000 
_diffrn_reflns_av_sigmaI/netI     0.1016 
_diffrn_reflns_limit_h_min        -15 
_diffrn_reflns_limit_h_max        15 
_diffrn_reflns_limit_k_min        0 
_diffrn_reflns_limit_k_max        12 
_diffrn_reflns_limit_l_min        0 
_diffrn_reflns_limit_l_max        22 
_diffrn_reflns_theta_min          1.89 
_diffrn_reflns_theta_max          24.73 
_reflns_number_total              4479 
_reflns_number_gt                 3409 
_reflns_threshold_expression      >2sigma(I) 
  
_computing_data_collection        'Bruker APEX2' 
_computing_cell_refinement        'Bruker SAINT' 
_computing_data_reduction         'Bruker SAINT' 
_computing_structure_solution     'SHELXS-97 (Sheldrick, 2008)' 
_computing_structure_refinement   'SHELXL-97 (Sheldrick, 2008)' 
_computing_molecular_graphics     'Bruker SHELXTL' 
_computing_publication_material   'Bruker SHELXTL' 
  
_refine_special_details 
; 
 Refinement of F^2^ against ALL reflections.  The weighted R-factor wR and 
 goodness of fit S are based on F^2^, conventional R-factors R are based 
 on F, with F set to zero for negative F^2^. The threshold expression of 
 F^2^ > 2sigma(F^2^) is used only for calculating R-factors(gt) etc. and is 
 not relevant to the choice of reflections for refinement.  R-factors based 
 on F^2^ are statistically about twice as large as those based on F, and R- 
 factors based on ALL data will be even larger. 
; 
  
_refine_ls_structure_factor_coef  Fsqd 
_refine_ls_matrix_type            full 
_refine_ls_weighting_scheme       calc 
_refine_ls_weighting_details 
 'calc w=1/[\s^2^(Fo^2^)+(0.0351P)^2^+0.2789P] where P=(Fo^2^+2Fc^2^)/3' 
_atom_sites_solution_primary      direct 
_atom_sites_solution_secondary    difmap 
_atom_sites_solution_hydrogens    geom 
_refine_ls_hydrogen_treatment     mixed 
_refine_ls_extinction_method      none 
_refine_ls_extinction_coef        ? 
_refine_ls_number_reflns          4479 
_refine_ls_number_parameters      506 
_refine_ls_number_restraints      987 
_refine_ls_R_factor_all           0.0645 
_refine_ls_R_factor_gt            0.0493 
_refine_ls_wR_factor_ref          0.1216 
_refine_ls_wR_factor_gt           0.1175 
_refine_ls_goodness_of_fit_ref    1.079 
_refine_ls_restrained_S_all       1.061 
_refine_ls_shift/su_max           0.002 
_refine_ls_shift/su_mean          0.000 
  
loop_ 
 _atom_site_label 
 _atom_site_type_symbol 
 _atom_site_fract_x 
 _atom_site_fract_y 
 _atom_site_fract_z 
 _atom_site_U_iso_or_equiv 
 _atom_site_adp_type 
 _atom_site_occupancy 
 _atom_site_symmetry_multiplicity 
 _atom_site_calc_flag 
 _atom_site_refinement_flags 
 _atom_site_disorder_assembly 
 _atom_site_disorder_group 
Ir1 Ir 1.52586(3) 0.62070(3) 0.515257(19) 0.02477(15) Uani 1 1 d . . . 
Cl2 Cl 1.57218(19) 0.83808(17) 0.54535(13) 0.0320(6) Uani 1 1 d . C . 
P2 P 1.39537(19) 0.6909(2) 0.44388(13) 0.0279(6) Uani 1 1 d U . . 
P1 P 1.6618(2) 0.5594(2) 0.58572(14) 0.0334(6) Uani 1 1 d DU A . 
C100 C 1.6179(7) 0.6272(7) 0.4372(5) 0.025(2) Uani 1 1 d . C . 
O4 O 1.4293(5) 0.7578(5) 0.3714(3) 0.0367(16) Uani 1 1 d . . . 
O3 O 1.3216(5) 0.7963(6) 0.4718(4) 0.0434(16) Uani 1 1 d DU . . 
N1 N 1.6875(6) 0.4116(7) 0.5893(4) 0.0361(16) Uani 1 1 d DU . . 
N2 N 1.6776(7) 0.6432(7) 0.3931(4) 0.036(2) Uani 1 1 d . . . 
C101 C 1.7574(10) 0.6301(10) 0.3389(7) 0.058(3) Uani 1 1 d U C . 
C104 C 1.7019(11) 0.5859(12) 0.2711(7) 0.074(3) Uani 1 1 d U . . 
H10A H 1.6726 0.5036 0.2793 0.110 Uiso 1 1 calc R C . 
H10B H 1.7508 0.5815 0.2319 0.110 Uiso 1 1 calc R . . 
H10C H 1.6466 0.6441 0.2585 0.110 Uiso 1 1 calc R . . 
C103 C 1.8070(10) 0.7548(12) 0.3286(7) 0.074(3) Uani 1 1 d U . . 
H10D H 1.7554 0.8138 0.3106 0.111 Uiso 1 1 calc R C . 
H10E H 1.8624 0.7474 0.2940 0.111 Uiso 1 1 calc R . . 
H10F H 1.8354 0.7842 0.3744 0.111 Uiso 1 1 calc R . . 
C102 C 1.8335(11) 0.5358(13) 0.3670(7) 0.086(4) Uani 1 1 d U . . 
H10G H 1.8633 0.5648 0.4125 0.128 Uiso 1 1 calc R C . 
H10H H 1.8882 0.5245 0.3324 0.128 Uiso 1 1 calc R . . 
H10I H 1.7982 0.4567 0.3745 0.128 Uiso 1 1 calc R . . 
F43 F 1.5248(6) 1.0317(5) 0.2941(3) 0.065(2) Uani 1 1 d . C . 
F42 F 1.5386(6) 0.8443(6) 0.2598(4) 0.074(2) Uani 1 1 d . C . 
F41 F 1.3928(6) 0.9235(8) 0.2648(5) 0.102(3) Uani 1 1 d . C . 
C41 C 1.4748(10) 0.8779(8) 0.3724(5) 0.050(3) Uani 1 1 d . C . 
H41A H 1.5446 0.8746 0.3943 0.060 Uiso 1 1 calc R . . 
H41B H 1.4325 0.9360 0.4003 0.060 Uiso 1 1 calc R . . 
C42 C 1.4798(9) 0.9185(9) 0.2973(7) 0.045(3) Uani 1 1 d . . . 
C32 C 1.2187(10) 0.9079(10) 0.5479(8) 0.060(4) Uani 1 1 d D . . 
C1 C 1.7810(9) 0.3679(10) 0.6302(7) 0.064(4) Uani 1 1 d U C . 
H1A H 1.8428 0.4025 0.6087 0.097 Uiso 1 1 calc R . . 
H1B H 1.7842 0.2773 0.6288 0.097 Uiso 1 1 calc R . . 
H1C H 1.7771 0.3955 0.6801 0.097 Uiso 1 1 calc R . . 
O1 O 1.6475(13) 0.5840(14) 0.6712(6) 0.043(2) Uani 0.468(7) 1 d PDU A 2 
C11 C 1.5773(14) 0.538(2) 0.7173(8) 0.054(3) Uani 0.468(7) 1 d PDU A 2 
H11A H 1.5447 0.4630 0.6967 0.065 Uiso 0.468(7) 1 calc PR A 2 
H11B H 1.5228 0.6004 0.7254 0.065 Uiso 0.468(7) 1 calc PR A 2 
C12 C 1.630(2) 0.507(3) 0.7857(11) 0.062(3) Uani 0.468(7) 1 d PDU A 2 
F11 F 1.6644(15) 0.5862(18) 0.8226(10) 0.070(4) Uani 0.468(7) 1 d PDU A 2 
F12 F 1.5436(13) 0.4576(17) 0.8290(7) 0.100(5) Uani 0.468(7) 1 d PDU A 2 
F13 F 1.6874(14) 0.4052(14) 0.7801(9) 0.096(5) Uani 0.468(7) 1 d PDU A 2 
O1A O 1.6897(12) 0.6158(13) 0.6615(7) 0.049(2) Uani 0.532(7) 1 d PDU A 1 
C11A C 1.6286(13) 0.6798(13) 0.7081(8) 0.058(2) Uani 0.532(7) 1 d PDU A 1 
H11C H 1.5667 0.7108 0.6821 0.070 Uiso 0.532(7) 1 calc PR A 1 
H11D H 1.6669 0.7520 0.7274 0.070 Uiso 0.532(7) 1 calc PR A 1 
C12A C 1.597(2) 0.598(2) 0.7685(11) 0.063(2) Uani 0.532(7) 1 d PDU A 1 
F11A F 1.5632(11) 0.4877(11) 0.7331(8) 0.078(3) Uani 0.532(7) 1 d PDU A 1 
F12A F 1.5399(11) 0.6315(14) 0.8095(6) 0.097(4) Uani 0.532(7) 1 d PDU A 1 
F13A F 1.6885(12) 0.5599(15) 0.8032(8) 0.064(4) Uani 0.532(7) 1 d PDU A 1 
C31 C 1.2540(11) 0.7831(11) 0.5279(8) 0.049(3) Uani 0.623(10) 1 d PDU B 1 
H31A H 1.2892 0.7428 0.5691 0.059 Uiso 0.623(10) 1 calc PR B 1 
H31B H 1.1947 0.7311 0.5129 0.059 Uiso 0.623(10) 1 calc PR B 1 
F31 F 1.3018(10) 0.9731(12) 0.5749(7) 0.099(4) Uani 0.623(10) 1 d PDU B 1 
F32 F 1.1568(9) 0.9056(11) 0.6013(6) 0.070(4) Uani 0.623(10) 1 d PDU B 1 
F33 F 1.1799(17) 0.9705(19) 0.4950(11) 0.096(6) Uani 0.623(10) 1 d PDU B 1 
C31A C 1.3247(12) 0.8749(19) 0.5308(11) 0.042(3) Uani 0.377(10) 1 d PDU B 2 
H31C H 1.3646 0.9504 0.5197 0.050 Uiso 0.377(10) 1 calc PR B 2 
H31D H 1.3583 0.8327 0.5720 0.050 Uiso 0.377(10) 1 calc PR B 2 
F31A F 1.167(2) 0.952(3) 0.4915(17) 0.101(9) Uani 0.377(10) 1 d PDU B 2 
F32A F 1.2208(17) 1.003(2) 0.5974(12) 0.104(6) Uani 0.377(10) 1 d PDU B 2 
F33A F 1.1671(14) 0.814(2) 0.5729(13) 0.100(6) Uani 0.377(10) 1 d PDU B 2 
O2 O 1.7702(10) 0.6195(12) 0.5754(8) 0.046(2) Uani 0.543(8) 1 d PDU A 1 
C21 C 1.8024(10) 0.7318(14) 0.6063(9) 0.050(3) Uani 0.543(8) 1 d PDU A 1 
H21A H 1.7976 0.7283 0.6590 0.060 Uiso 0.543(8) 1 calc PR A 1 
H21B H 1.7594 0.8012 0.5883 0.060 Uiso 0.543(8) 1 calc PR A 1 
C22 C 1.9095(12) 0.748(2) 0.5851(11) 0.056(2) Uani 0.543(8) 1 d PDU A 1 
F22 F 1.9182(10) 0.7641(13) 0.5155(6) 0.071(3) Uani 0.543(8) 1 d PDU A 1 
F21 F 1.9522(8) 0.8443(11) 0.6170(7) 0.073(3) Uani 0.543(8) 1 d PDU A 1 
F23 F 1.9642(14) 0.6425(17) 0.5998(11) 0.070(4) Uani 0.543(8) 1 d PDU A 1 
O2A O 1.7724(11) 0.5938(14) 0.5485(9) 0.041(2) Uani 0.457(8) 1 d PDU A 2 
C21A C 1.8199(11) 0.7105(14) 0.5418(10) 0.050(2) Uani 0.457(8) 1 d PDU A 2 
H21C H 1.7984 0.7646 0.5815 0.060 Uiso 0.457(8) 1 calc PR A 2 
H21D H 1.7968 0.7494 0.4963 0.060 Uiso 0.457(8) 1 calc PR A 2 
C22A C 1.935(2) 0.700(3) 0.5429(18) 0.056(3) Uani 0.457(8) 1 d PU A 2 
F21A F 1.9684(10) 0.6329(13) 0.4920(8) 0.071(4) Uani 0.457(8) 1 d PDU A 2 
F22A F 1.9734(10) 0.8178(13) 0.5323(9) 0.071(3) Uani 0.457(8) 1 d PDU A 2 
F23A F 1.9713(16) 0.669(2) 0.6051(12) 0.070(4) Uani 0.457(8) 1 d PDU A 2 
Cl1 Cl 1.4106(8) 0.6272(9) 0.6149(5) 0.0280(17) Uani 0.50 1 d PU C 1 
O6 O 1.4196(11) 0.7098(11) 0.6485(7) 0.032(3) Uani 0.50 1 d PDU C 2 
H1 H 1.394(14) 0.766(13) 0.623(9) 0.048 Uiso 0.50 1 d PD D 2 
O5 O 1.423(2) 0.607(2) 0.5939(13) 0.026(5) Uani 0.50 1 d PU C 2 
  
loop_ 
 _atom_site_aniso_label 
 _atom_site_aniso_U_11 
 _atom_site_aniso_U_22 
 _atom_site_aniso_U_33 
 _atom_site_aniso_U_23 
 _atom_site_aniso_U_13 
 _atom_site_aniso_U_12 
Ir1 0.0226(2) 0.0171(2) 0.0348(3) -0.00032(16) 0.00502(15) -0.00016(15) 
Cl2 0.0378(14) 0.0102(10) 0.0482(15) -0.0050(10) 0.0034(11) 0.0002(9) 
P2 0.0302(15) 0.0180(12) 0.0356(15) -0.0008(10) 0.0012(11) 0.0013(10) 
P1 0.0297(14) 0.0222(12) 0.0480(15) -0.0028(11) -0.0070(12) 0.0007(10) 
C100 0.034(6) 0.009(4) 0.034(6) 0.000(4) 0.000(4) 0.000(4) 
O4 0.058(5) 0.014(3) 0.038(4) 0.003(3) 0.000(3) -0.006(3) 
O3 0.046(4) 0.034(3) 0.051(4) -0.009(3) 0.002(3) 0.015(3) 
N1 0.028(4) 0.0248(19) 0.055(5) -0.001(3) -0.010(3) 0.003(2) 
N2 0.041(5) 0.024(4) 0.042(5) 0.006(4) 0.017(4) 0.004(4) 
C101 0.053(7) 0.061(6) 0.060(6) 0.018(5) 0.036(5) 0.020(4) 
C104 0.079(9) 0.079(8) 0.064(7) -0.001(6) 0.037(5) 0.017(6) 
C103 0.057(8) 0.082(6) 0.085(9) 0.027(6) 0.033(7) -0.001(5) 
C102 0.074(9) 0.097(8) 0.087(8) 0.031(7) 0.047(6) 0.051(7) 
F43 0.098(6) 0.037(3) 0.061(4) 0.007(3) 0.025(4) -0.020(4) 
F42 0.095(6) 0.051(4) 0.078(5) -0.003(4) 0.041(5) -0.007(4) 
F41 0.063(6) 0.124(7) 0.118(7) 0.091(6) -0.028(5) -0.014(5) 
C41 0.097(10) 0.019(5) 0.034(6) 0.006(4) 0.001(6) -0.014(5) 
C42 0.042(7) 0.025(5) 0.070(8) 0.012(5) 0.009(6) 0.000(5) 
C32 0.046(8) 0.049(7) 0.087(11) -0.009(7) 0.007(7) 0.010(6) 
C1 0.049(7) 0.045(6) 0.098(9) 0.014(6) -0.033(6) 0.009(5) 
O1 0.035(5) 0.043(5) 0.052(3) -0.014(3) -0.007(3) -0.004(4) 
C11 0.046(6) 0.062(6) 0.054(3) -0.017(5) 0.005(3) -0.001(5) 
C12 0.054(6) 0.079(6) 0.054(4) -0.009(5) 0.006(4) -0.006(5) 
F11 0.064(9) 0.089(7) 0.058(8) -0.005(6) -0.007(7) -0.018(6) 
F12 0.089(9) 0.144(13) 0.067(7) 0.003(8) 0.010(7) -0.053(8) 
F13 0.112(11) 0.080(8) 0.095(11) 0.014(7) -0.006(8) 0.020(7) 
O1A 0.045(6) 0.046(5) 0.056(3) -0.017(3) -0.015(3) 0.011(4) 
C11A 0.051(6) 0.062(5) 0.060(4) -0.024(3) -0.014(4) 0.015(5) 
C12A 0.052(5) 0.074(6) 0.062(5) -0.023(4) -0.005(3) 0.008(5) 
F11A 0.060(7) 0.091(7) 0.082(8) -0.024(5) -0.009(6) -0.021(6) 
F12A 0.082(8) 0.174(12) 0.034(6) -0.034(6) -0.012(4) 0.042(8) 
F13A 0.049(6) 0.076(8) 0.066(8) 0.002(6) -0.010(5) -0.016(5) 
C31 0.044(6) 0.041(6) 0.061(7) -0.008(5) 0.008(4) 0.016(5) 
F31 0.073(9) 0.105(9) 0.119(10) -0.027(8) 0.019(8) -0.030(8) 
F32 0.049(7) 0.083(9) 0.079(8) -0.014(7) 0.037(6) -0.002(6) 
F33 0.102(11) 0.090(10) 0.096(10) 0.013(9) 0.018(9) 0.074(9) 
C31A 0.037(7) 0.034(6) 0.054(7) -0.012(5) 0.005(6) 0.012(6) 
F31A 0.092(14) 0.115(16) 0.097(14) 0.022(14) 0.017(13) 0.085(14) 
F32A 0.079(12) 0.119(13) 0.115(12) -0.041(11) 0.031(11) 0.038(11) 
F33A 0.054(10) 0.128(13) 0.120(13) 0.030(11) 0.031(10) -0.017(11) 
O2 0.037(3) 0.040(4) 0.061(5) 0.004(4) -0.014(4) -0.014(3) 
C21 0.034(4) 0.048(5) 0.068(6) -0.006(5) -0.012(5) -0.015(3) 
C22 0.035(4) 0.059(5) 0.072(5) -0.004(5) -0.010(5) -0.019(3) 
F22 0.058(7) 0.078(7) 0.075(5) 0.002(5) -0.003(5) -0.037(6) 
F21 0.038(6) 0.083(6) 0.097(7) -0.030(6) 0.008(6) -0.031(5) 
F23 0.040(6) 0.081(6) 0.090(8) -0.008(6) -0.018(6) 0.000(6) 
O2A 0.031(4) 0.041(5) 0.051(5) 0.001(5) -0.011(4) -0.011(4) 
C21A 0.034(3) 0.047(4) 0.067(5) -0.001(5) -0.011(4) -0.016(3) 
C22A 0.034(4) 0.061(5) 0.074(5) -0.004(5) -0.013(5) -0.018(4) 
F21A 0.046(7) 0.080(7) 0.088(7) -0.008(6) 0.008(7) -0.015(6) 
F22A 0.044(6) 0.071(6) 0.096(8) 0.002(5) -0.003(7) -0.030(5) 
F23A 0.042(7) 0.084(9) 0.083(6) 0.006(6) -0.017(6) -0.002(8) 
Cl1 0.026(3) 0.026(4) 0.032(5) -0.004(3) 0.014(3) 0.000(3) 
O6 0.044(8) 0.015(6) 0.039(8) -0.007(5) 0.019(6) 0.004(5) 
O5 0.037(10) 0.019(9) 0.021(12) -0.002(5) 0.022(8) -0.002(7) 
  
_geom_special_details 
; 
 All esds (except the esd in the dihedral angle between two l.s. planes) 
 are estimated using the full covariance matrix.  The cell esds are taken 
 into account individually in the estimation of esds in distances, angles 
 and torsion angles; correlations between esds in cell parameters are only 
 used when they are defined by crystal symmetry.  An approximate (isotropic) 
 treatment of cell esds is used for estimating esds involving l.s. planes. 
; 
  
loop_ 
 _geom_bond_atom_site_label_1 
 _geom_bond_atom_site_label_2 
 _geom_bond_distance 
 _geom_bond_site_symmetry_2 
 _geom_bond_publ_flag 
Ir1 C100 1.906(10) . ? 
Ir1 O5 2.01(2) . ? 
Ir1 P2 2.269(3) . ? 
Ir1 P1 2.283(3) . ? 
Ir1 Cl1 2.415(9) . ? 
Ir1 Cl2 2.485(2) . ? 
Ir1 Ir1 2.7492(8) 3_866 ? 
P2 O3 1.583(6) . ? 
P2 O4 1.605(6) . ? 
P2 N1 1.657(8) 3_866 ? 
P1 O2 1.566(11) . ? 
P1 O1A 1.578(11) . ? 
P1 N1 1.632(8) . ? 
P1 O1 1.635(11) . ? 
P1 O2A 1.651(12) . ? 
C100 N2 1.157(11) . ? 
O4 C41 1.426(10) . ? 
O3 C31 1.388(12) . ? 
O3 C31A 1.392(14) . ? 
N1 C1 1.501(13) . ? 
N1 P2 1.657(8) 3_866 ? 
N2 C101 1.471(12) . ? 
C101 C103 1.507(16) . ? 
C101 C102 1.507(16) . ? 
C101 C104 1.523(19) . ? 
F43 C42 1.358(11) . ? 
F42 C42 1.320(12) . ? 
F41 C42 1.275(13) . ? 
C41 C42 1.472(14) . ? 
C32 F33 1.292(19) . ? 
C32 F32 1.294(15) . ? 
C32 F33A 1.31(2) . ? 
C32 F31A 1.33(2) . ? 
C32 F31 1.378(16) . ? 
C32 F32A 1.38(2) . ? 
C32 C31A 1.466(16) . ? 
C32 C31 1.474(14) . ? 
O1 C11 1.360(15) . ? 
C11 C12 1.475(18) . ? 
C12 F11 1.18(3) . ? 
C12 F13 1.34(3) . ? 
C12 F12 1.49(3) . ? 
O1A C11A 1.376(14) . ? 
C11A C12A 1.499(18) . ? 
C12A F12A 1.13(2) . ? 
C12A F13A 1.41(3) . ? 
C12A F11A 1.43(2) . ? 
O2 C21 1.403(13) . ? 
C21 C22 1.466(17) . ? 
C22 F22 1.32(2) . ? 
C22 F21 1.32(2) . ? 
C22 F23 1.36(3) . ? 
O2A C21A 1.410(14) . ? 
C21A C22A 1.51(3) . ? 
C22A F21A 1.27(3) . ? 
C22A F23A 1.29(4) . ? 
C22A F22A 1.38(3) . ? 
O6 O5 1.509(19) . ? 
  
loop_ 
 _geom_angle_atom_site_label_1 
 _geom_angle_atom_site_label_2 
 _geom_angle_atom_site_label_3 
 _geom_angle 
 _geom_angle_site_symmetry_1 
 _geom_angle_site_symmetry_3 
 _geom_angle_publ_flag 
C100 Ir1 O5 176.4(8) . . ? 
C100 Ir1 P2 90.6(3) . . ? 
O5 Ir1 P2 87.4(10) . . ? 
C100 Ir1 P1 87.8(3) . . ? 
O5 Ir1 P1 94.3(10) . . ? 
P2 Ir1 P1 176.95(9) . . ? 
C100 Ir1 Cl1 176.2(3) . . ? 
O5 Ir1 Cl1 6.8(8) . . ? 
P2 Ir1 Cl1 88.6(3) . . ? 
P1 Ir1 Cl1 92.8(3) . . ? 
C100 Ir1 Cl2 89.2(2) . . ? 
O5 Ir1 Cl2 93.7(6) . . ? 
P2 Ir1 Cl2 89.59(8) . . ? 
P1 Ir1 Cl2 87.78(8) . . ? 
Cl1 Ir1 Cl2 87.1(2) . . ? 
C100 Ir1 Ir1 91.8(2) . 3_866 ? 
O5 Ir1 Ir1 85.4(6) . 3_866 ? 
P2 Ir1 Ir1 91.01(6) . 3_866 ? 
P1 Ir1 Ir1 91.65(6) . 3_866 ? 
Cl1 Ir1 Ir1 92.0(2) . 3_866 ? 
Cl2 Ir1 Ir1 178.89(6) . 3_866 ? 
O3 P2 O4 97.6(4) . . ? 
O3 P2 N1 102.1(4) . 3_866 ? 
O4 P2 N1 99.9(4) . 3_866 ? 
O3 P2 Ir1 119.8(3) . . ? 
O4 P2 Ir1 115.6(3) . . ? 
N1 P2 Ir1 118.1(3) 3_866 . ? 
O2 P1 O1A 76.0(8) . . ? 
O2 P1 N1 103.1(6) . . ? 
O1A P1 N1 107.3(6) . . ? 
O2 P1 O1 99.9(8) . . ? 
O1A P1 O1 24.2(6) . . ? 
N1 P1 O1 98.4(7) . . ? 
O2 P1 O2A 20.4(7) . . ? 
O1A P1 O2A 96.0(8) . . ? 
N1 P1 O2A 93.3(6) . . ? 
O1 P1 O2A 119.5(8) . . ? 
O2 P1 Ir1 119.9(6) . . ? 
O1A P1 Ir1 124.7(5) . . ? 
N1 P1 Ir1 117.5(3) . . ? 
O1 P1 Ir1 114.6(6) . . ? 
O2A P1 Ir1 111.3(7) . . ? 
N2 C100 Ir1 172.5(8) . . ? 
C41 O4 P2 121.3(6) . . ? 
C31 O3 C31A 58.2(10) . . ? 
C31 O3 P2 124.8(7) . . ? 
C31A O3 P2 133.7(9) . . ? 
C1 N1 P1 119.4(7) . . ? 
C1 N1 P2 119.7(6) . 3_866 ? 
P1 N1 P2 120.5(5) . 3_866 ? 
C100 N2 C101 165.7(9) . . ? 
N2 C101 C103 108.1(9) . . ? 
N2 C101 C102 106.9(9) . . ? 
C103 C101 C102 111.7(12) . . ? 
N2 C101 C104 105.9(10) . . ? 
C103 C101 C104 111.8(10) . . ? 
C102 C101 C104 112.1(11) . . ? 
O4 C41 C42 106.5(8) . . ? 
F41 C42 F42 106.8(11) . . ? 
F41 C42 F43 108.6(9) . . ? 
F42 C42 F43 105.5(9) . . ? 
F41 C42 C41 114.4(10) . . ? 
F42 C42 C41 111.3(9) . . ? 
F43 C42 C41 109.7(9) . . ? 
F33 C32 F32 111.2(14) . . ? 
F33 C32 F33A 119(2) . . ? 
F32 C32 F33A 51.6(11) . . ? 
F33 C32 F31A 11(3) . . ? 
F32 C32 F31A 108.1(18) . . ? 
F33A C32 F31A 108.1(19) . . ? 
F33 C32 F31 107.7(15) . . ? 
F32 C32 F31 102.8(12) . . ? 
F33A C32 F31 132.1(17) . . ? 
F31A C32 F31 119(2) . . ? 
F33 C32 F32A 97.3(18) . . ? 
F32 C32 F32A 60.1(12) . . ? 
F33A C32 F32A 109.9(17) . . ? 
F31A C32 F32A 105.5(17) . . ? 
F31 C32 F32A 50.9(10) . . ? 
F33 C32 C31A 108.3(19) . . ? 
F32 C32 C31A 139.9(15) . . ? 
F33A C32 C31A 112.4(14) . . ? 
F31A C32 C31A 112.0(16) . . ? 
F31 C32 C31A 58.0(9) . . ? 
F32A C32 C31A 108.7(13) . . ? 
F33 C32 C31 113.7(13) . . ? 
F32 C32 C31 112.4(11) . . ? 
F33A C32 C31 63.1(12) . . ? 
F31A C32 C31 106(2) . . ? 
F31 C32 C31 108.3(11) . . ? 
F32A C32 C31 147.8(16) . . ? 
C31A C32 C31 54.7(9) . . ? 
C11 O1 P1 130.6(13) . . ? 
O1 C11 C12 109.1(18) . . ? 
F11 C12 F13 115(2) . . ? 
F11 C12 C11 121(2) . . ? 
F13 C12 C11 111.5(19) . . ? 
F11 C12 F12 103(2) . . ? 
F13 C12 F12 100(2) . . ? 
C11 C12 F12 102.3(17) . . ? 
C11A O1A P1 129.5(12) . . ? 
O1A C11A C12A 110.6(15) . . ? 
F12A C12A F13A 109.8(19) . . ? 
F12A C12A F11A 113(2) . . ? 
F13A C12A F11A 102.6(17) . . ? 
F12A C12A C11A 120.9(19) . . ? 
F13A C12A C11A 105.9(16) . . ? 
F11A C12A C11A 103.3(14) . . ? 
O3 C31 C32 107.7(10) . . ? 
O3 C31A C32 108.0(12) . . ? 
C21 O2 P1 124.7(11) . . ? 
O2 C21 C22 105.5(12) . . ? 
F22 C22 F21 107.3(17) . . ? 
F22 C22 F23 104.9(18) . . ? 
F21 C22 F23 110.7(17) . . ? 
F22 C22 C21 112.5(14) . . ? 
F21 C22 C21 111.3(16) . . ? 
F23 C22 C21 110.0(16) . . ? 
C21A O2A P1 128.6(12) . . ? 
O2A C21A C22A 111.6(17) . . ? 
F21A C22A F23A 114(3) . . ? 
F21A C22A F22A 107(2) . . ? 
F23A C22A F22A 104(2) . . ? 
F21A C22A C21A 112(2) . . ? 
F23A C22A C21A 112(3) . . ? 
F22A C22A C21A 107(2) . . ? 
O6 O5 Ir1 118.0(16) . . ? 
  
_diffrn_measured_fraction_theta_max    0.998 
_diffrn_reflns_theta_full              24.73 
_diffrn_measured_fraction_theta_full   0.998 
_refine_diff_density_max    2.092 
_refine_diff_density_min   -1.735 
_refine_diff_density_rms    0.189 
